# Supplementary material for: Discovery of AD258 as a Sigma Receptor Ligand with Potent Antiallodynic Activity
Source: PubMed Central journal article supplement (PMC10461227; doi:10.1021/acs.jmedchem.3c00959), 2023-08-03
Supplement: jm3c00959_si_001.pdf [file jm3c00959_si_001.pdf]

# Supporting Information

## Discovery of AD258 as a Sigma Receptor Ligand with Potent Antiallodynic Activity

Maria Dichiarà,<sup>†</sup> Francesca Alessandra Ambrosio,<sup>‡</sup> Sang Min Lee,<sup>||</sup> M. Carmen Ruiz-Cantero,<sup>#</sup> Jessica Lombino,<sup>†</sup> Adriana Coricello,<sup>§</sup> Giosuè Costa,<sup>§,⊥</sup> Dhara Shah,<sup>||</sup> Giuliana Costanzo,<sup>†</sup> Lorella Pasquinucci,<sup>†</sup> Kyung No Son,<sup>‡</sup> Giuseppe Cosentino,<sup>†</sup> Rafael González-Cano,<sup>#</sup> Agostino Marrazzo,<sup>†</sup> Vinay Kumar Aakalu,<sup>‡</sup> Enrique J. Cobos,<sup>#</sup> Stefano Alcaro,<sup>§,⊥,\*</sup> and Emanuele Amata<sup>†,\*</sup>

<sup>†</sup>Dipartimento di Scienze del Farmaco e della Salute, Università degli Studi di Catania, Viale Andrea Doria 6, 95125 Catania, Italy;

<sup>‡</sup>Dipartimento di Medicina Sperimentale e Clinica, Università degli Studi “Magna Græcia” di Catanzaro, Campus “S. Venuta”, Viale Europa, 88100, Catanzaro, Italy;

<sup>||</sup>Department of Ophthalmology and Visual Sciences, University of Illinois at Chicago, 1905 W. Taylor St, Chicago, IL 60612, United States;

<sup>#</sup>Departamento de Farmacología e Instituto de Neurociencias, Facultad de Medicina, Universidad de Granada e Instituto de Investigación Biosanitaria de Granada ibs.GRANADA, Avenida de la Investigación, 18016 Granada, Spain;

<sup>§</sup>Dipartimento di Scienze della Salute, Università “Magna Græcia” di Catanzaro, Campus “S. Venuta”, 88100, Catanzaro, Italy;

<sup>⊥</sup>Net4Science Academic Spin-Off, Università “Magna Græcia” di Catanzaro, Campus “S. Venuta”, 88100, Catanzaro, Italy.

<sup>†</sup>Department of Ophthalmology and Visual Sciences, University of Michigan, 1000 Wall Street, Ann Arbor, Michigan, 48105, United States;

\*Emanuele Amata: phone, (+39) 0957384102; email, eamata@unict.it

\*Stefano Alcaro: phone, (+39) 09613694198; email, alcaro@unicz.it

---

### Table of contents

---

|                                                                         |     |
|-------------------------------------------------------------------------|-----|
| <sup>1</sup> H and <sup>13</sup> C NMR spectra                          | S2  |
| Molecular modeling analysis                                             | S21 |
| Docking Score analysis (Table S1)                                       | S21 |
| Sequence alignment between human and bovine S2R (Figure S1)             | S22 |
| Count and percentage of actives in top N% of results for S1R (Table S2) | S22 |
| Percent screen plot for S1R (Figure S2)                                 | S22 |
| Count and percentage of actives in top N% of results for S2R (Table S3) | S23 |
| Percent screen plot for S2R (Figure S3)                                 | S23 |

---

# $^1\text{H}$ and $^{13}\text{C}$ NMR spectra

NMR spectra in  $\text{CDCl}_3$  from final compounds synthesized by the authors are included.

## Compound 7b (AD214)

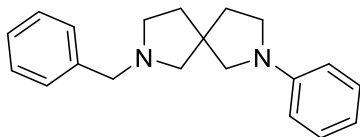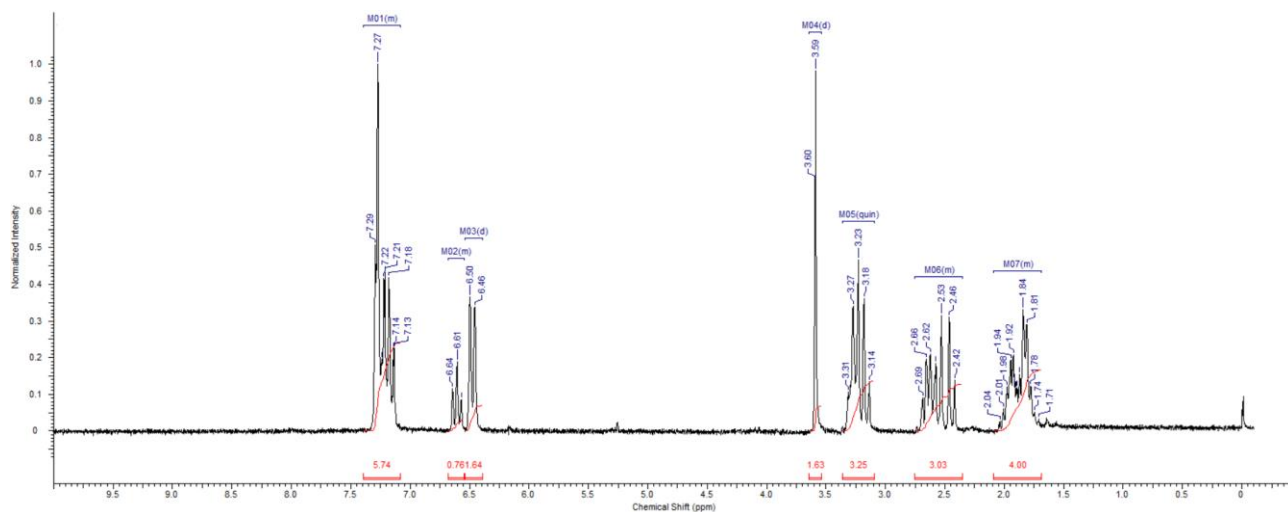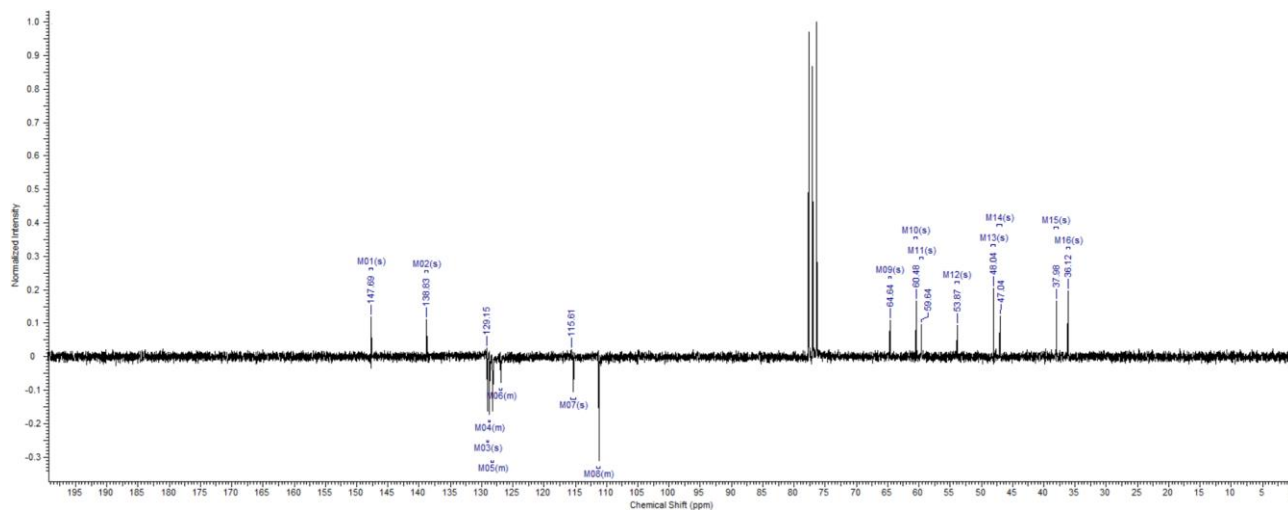

# Compound 8a (AD174)

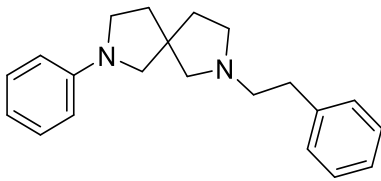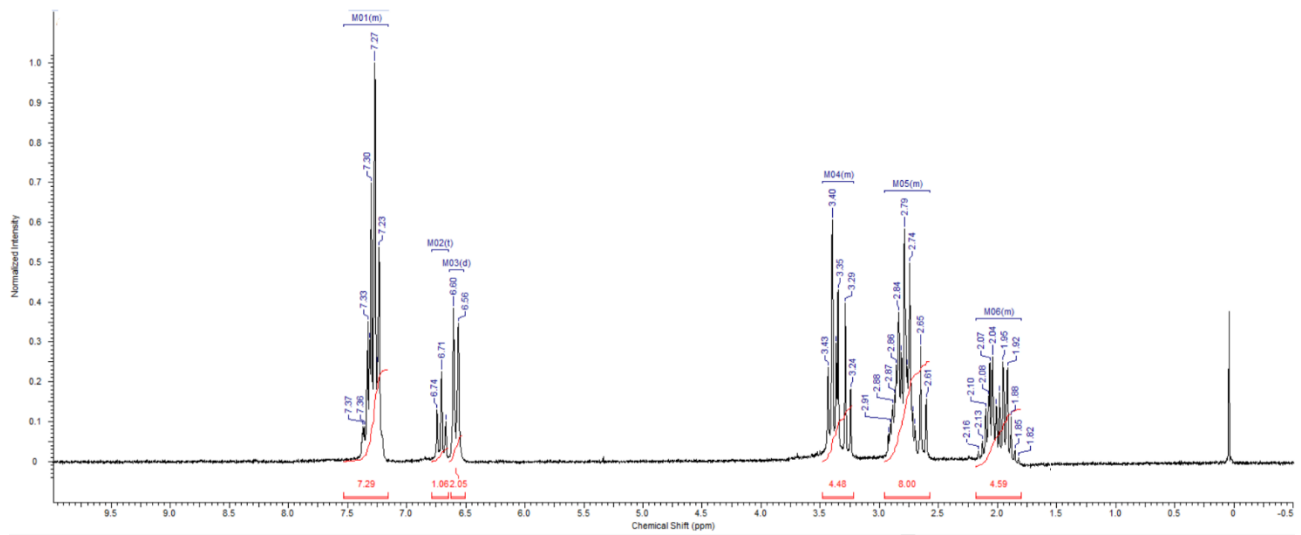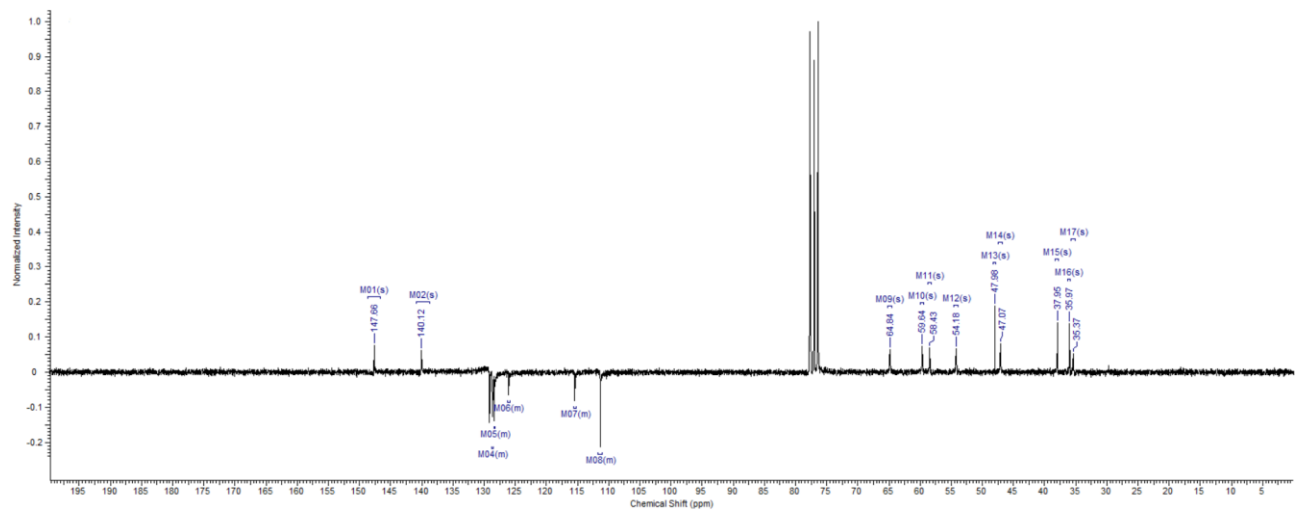

# Compound 8b (AD157)

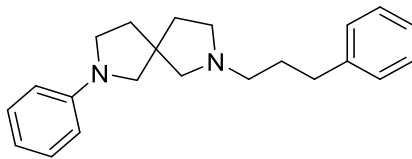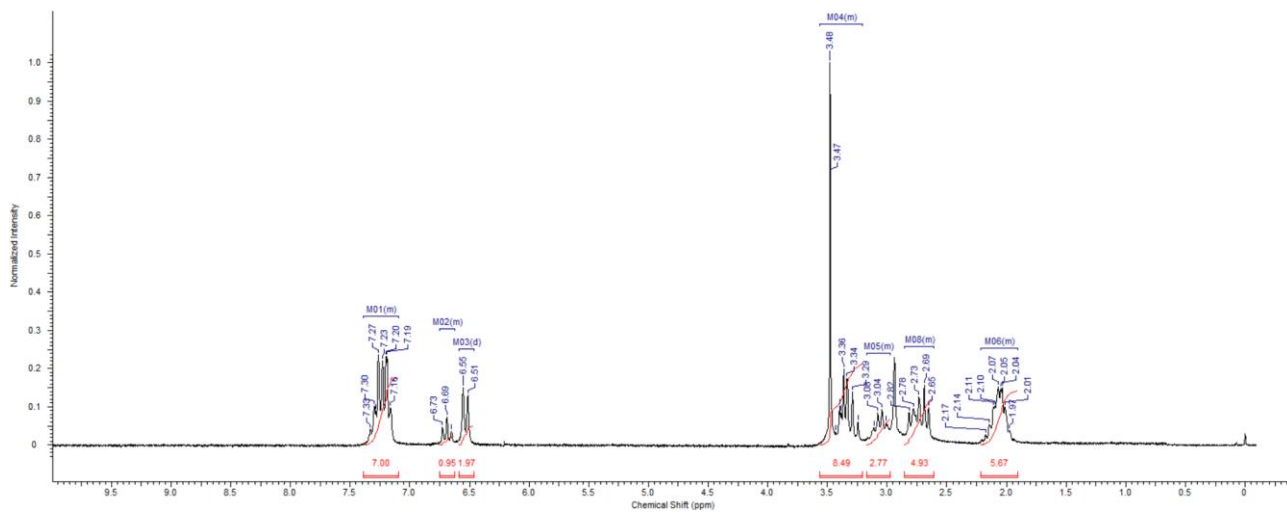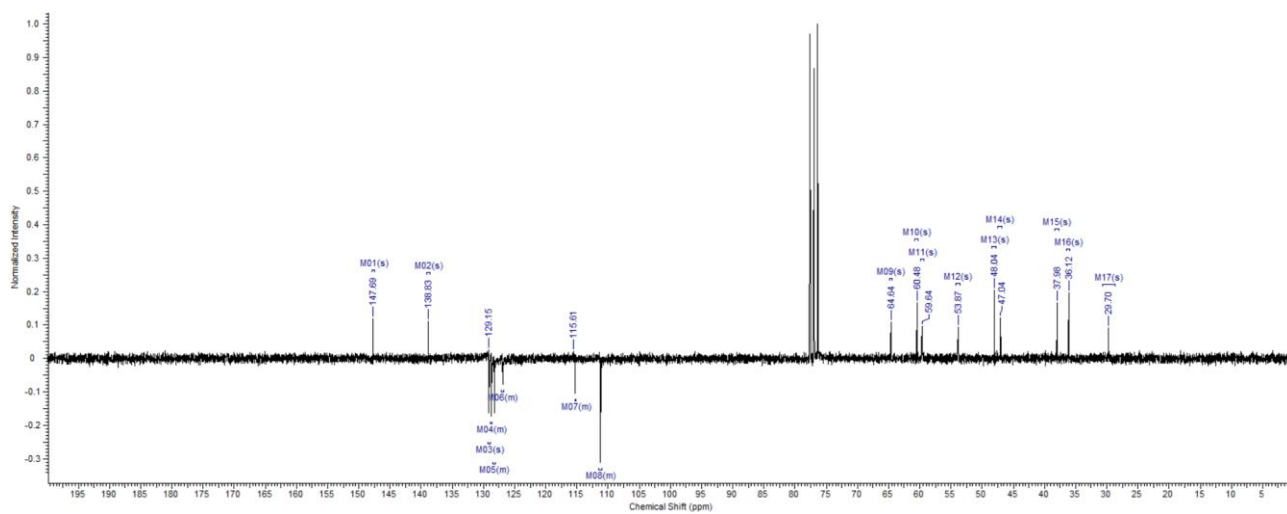

# Compound 9a (AD242)

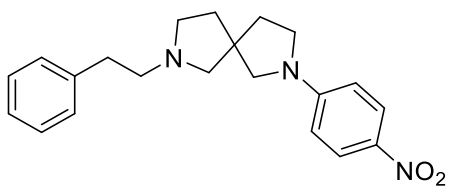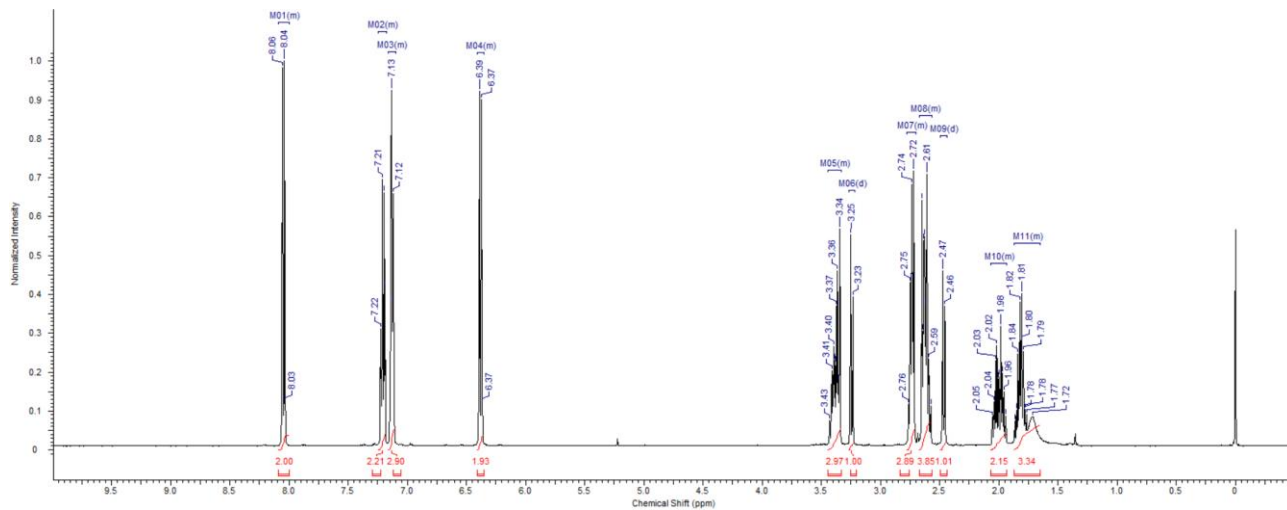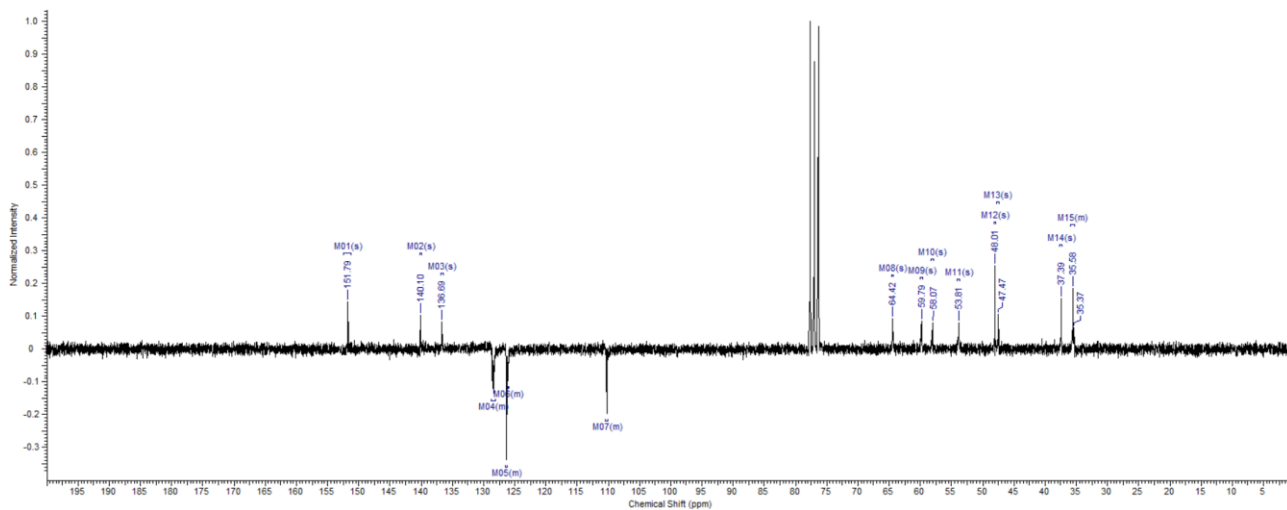

# Compound 9b (AD239)

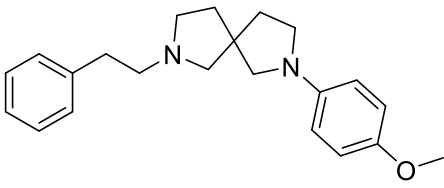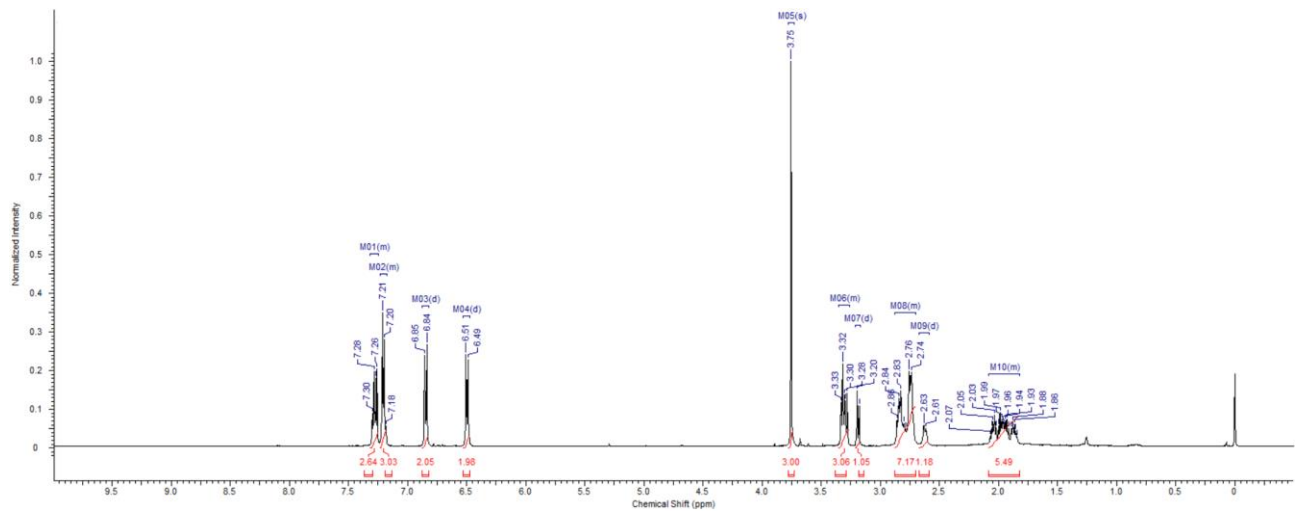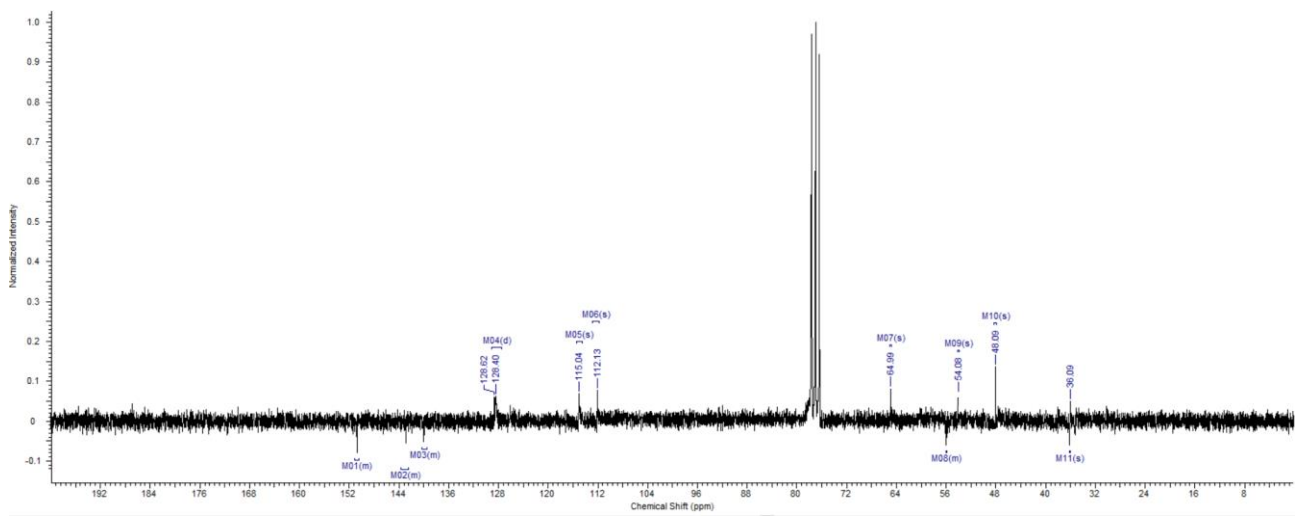

# Compound 9c (AD245)

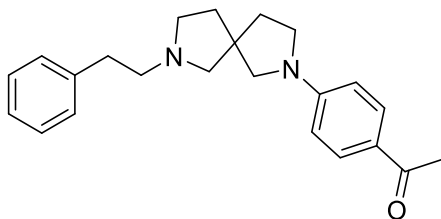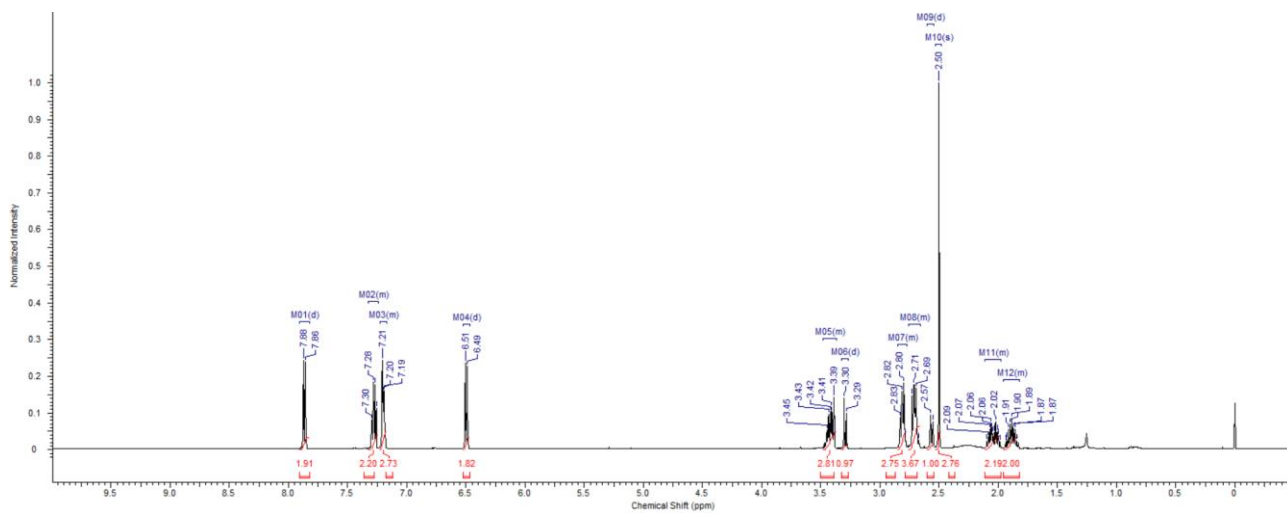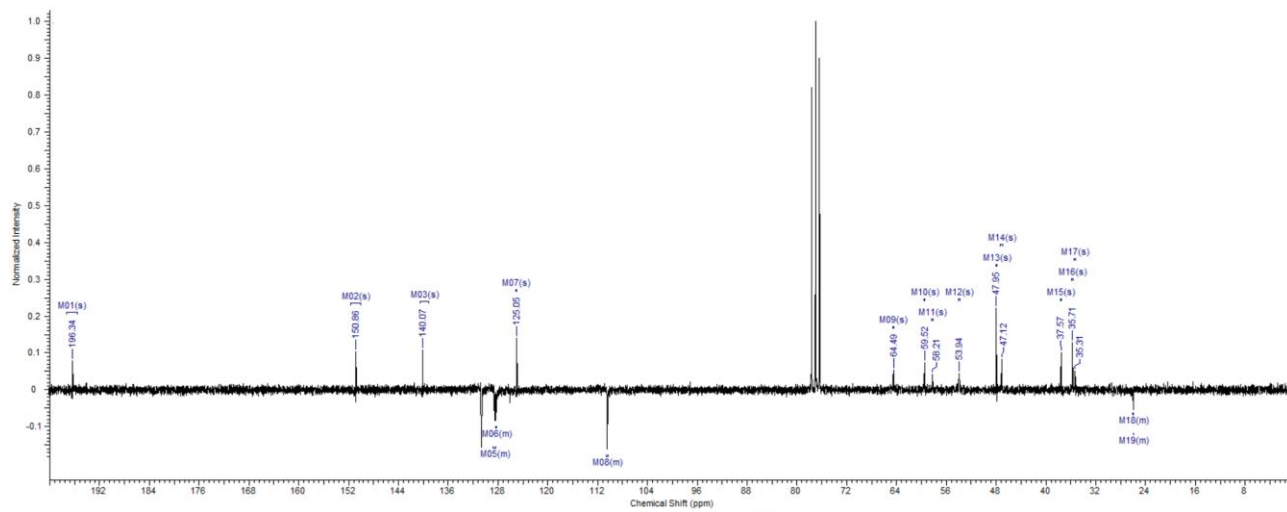

# Compound 9d (AD258)

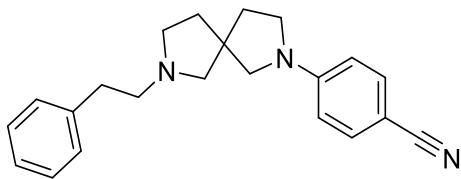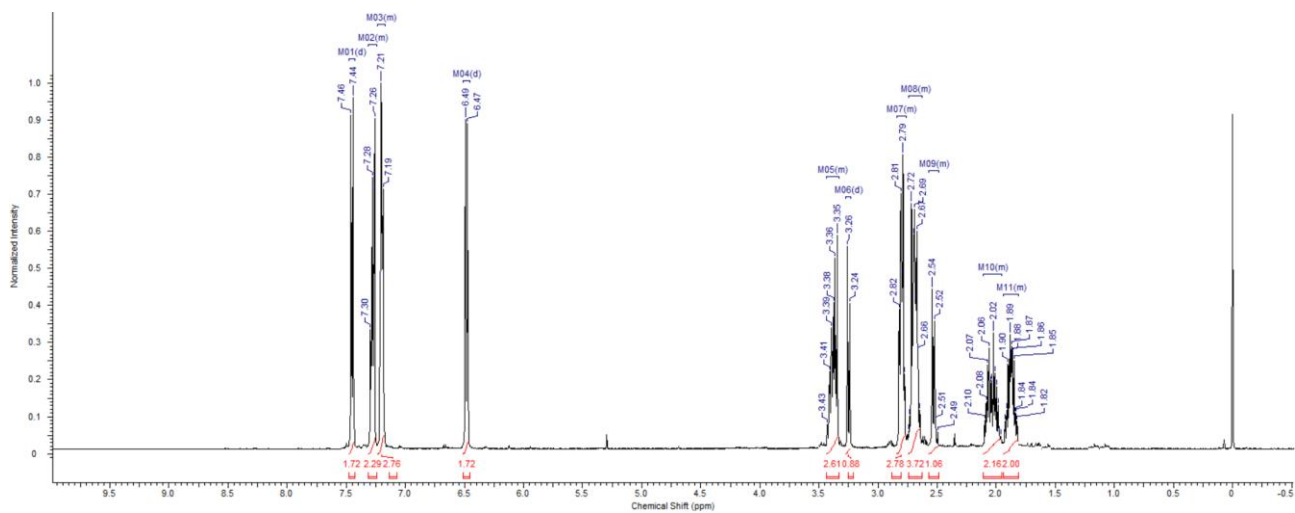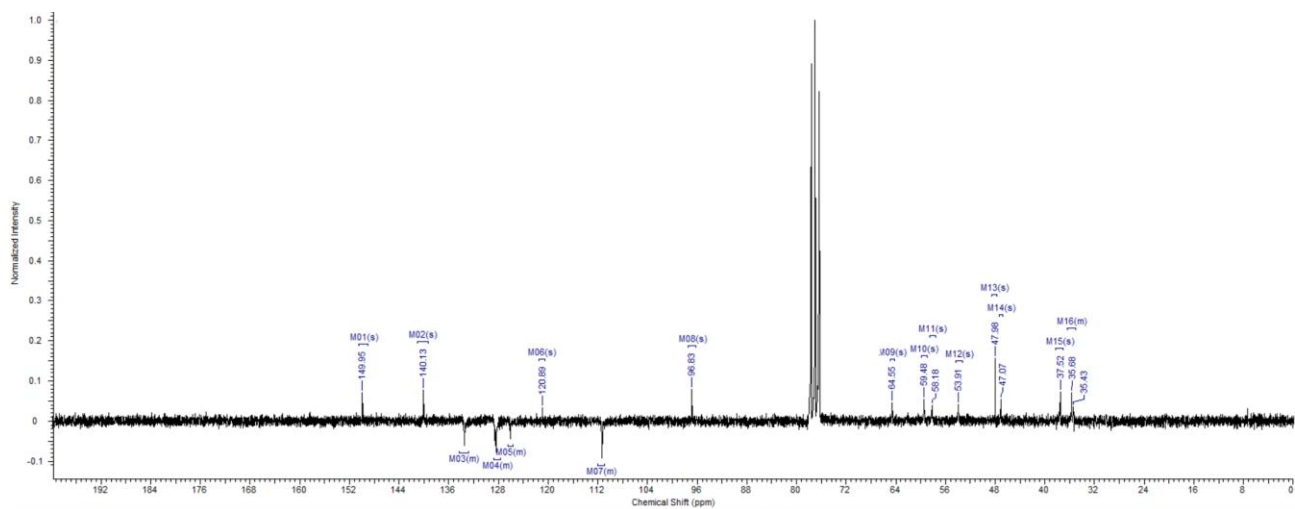



# Compound 11b (AD206)

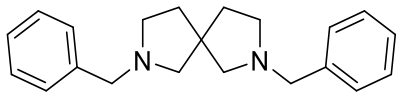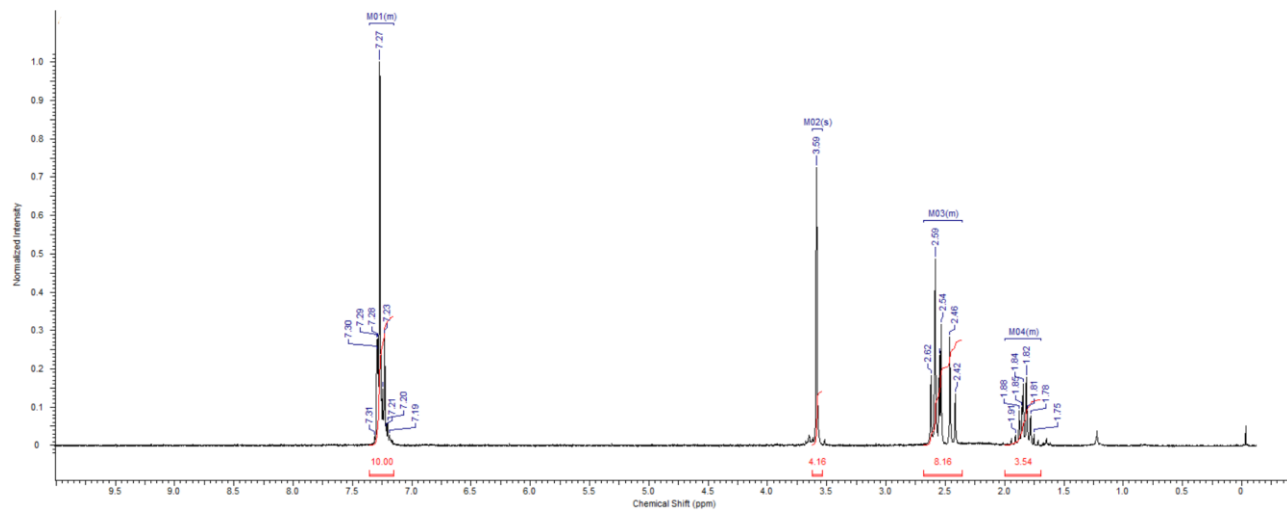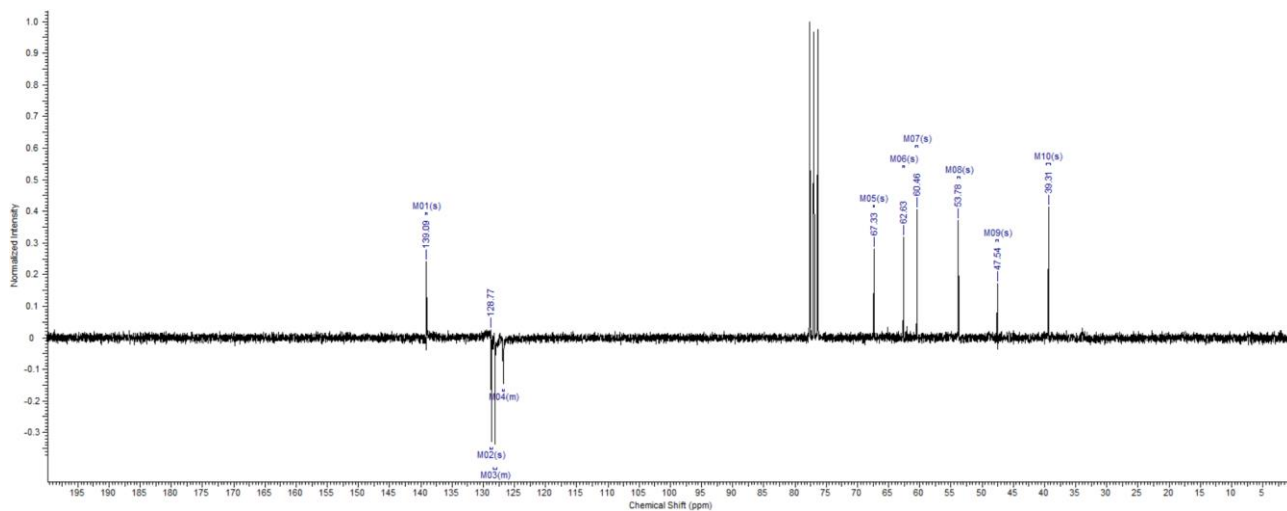

# Compound 13a (AD145)

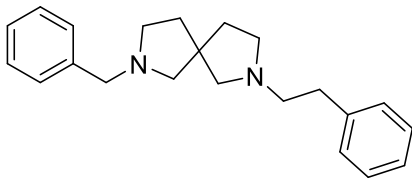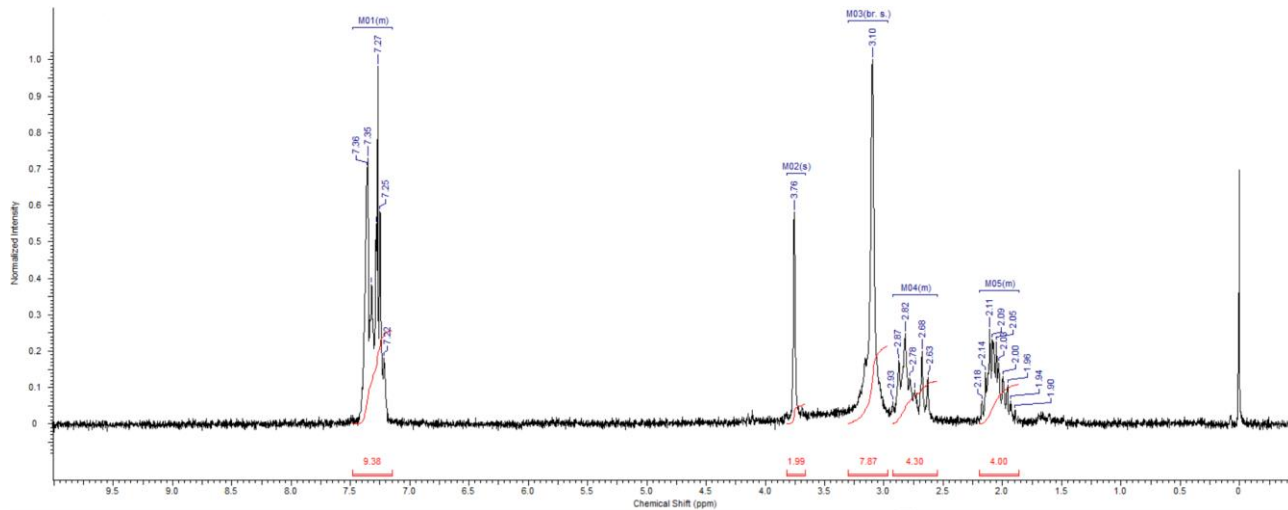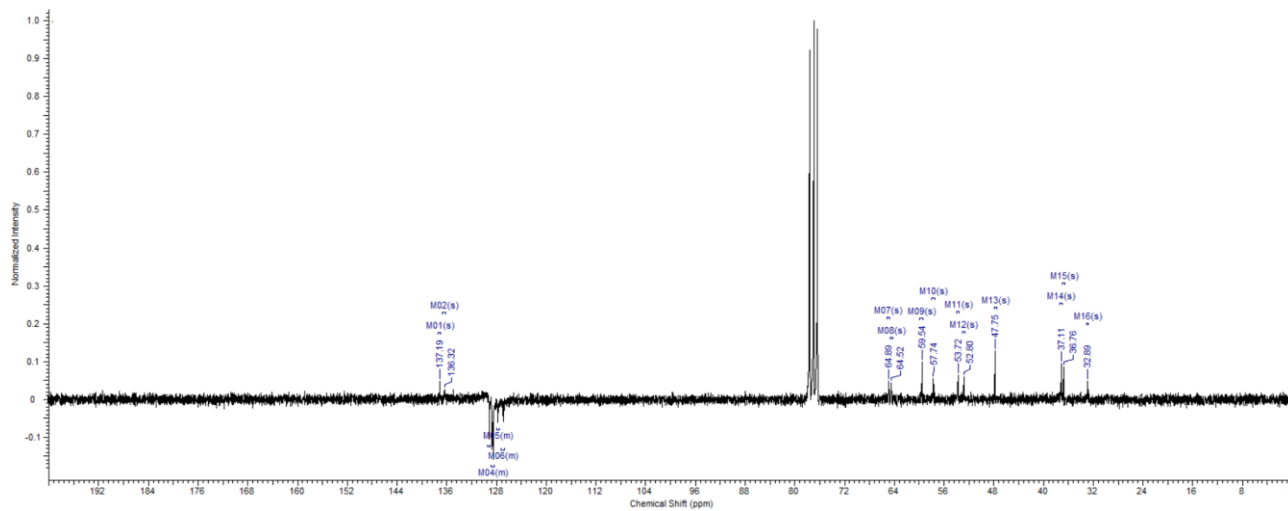

# Compound 13b (AD193)

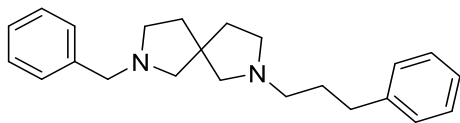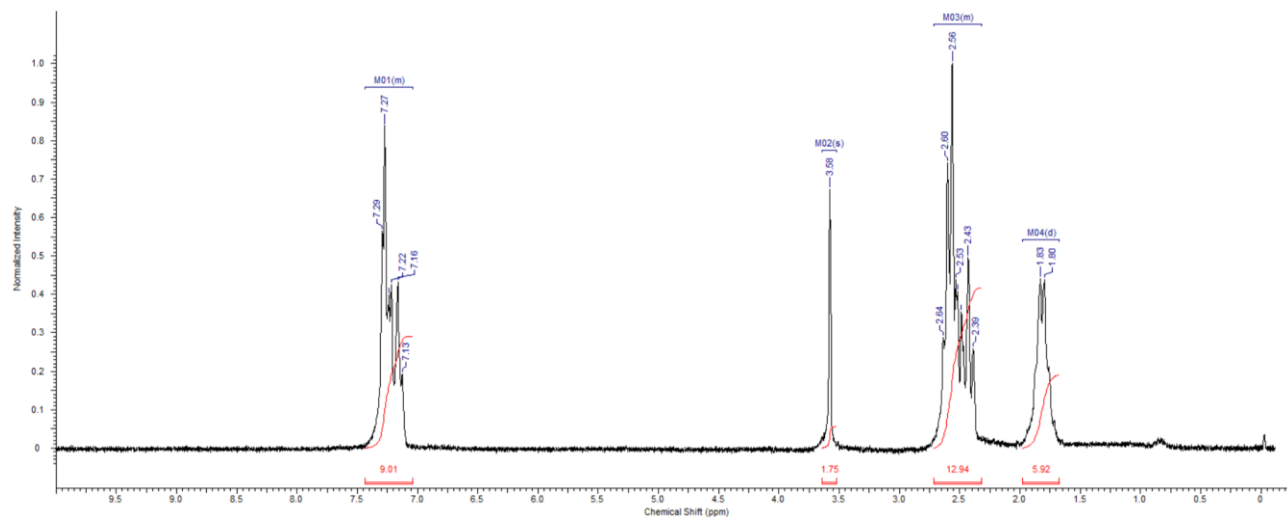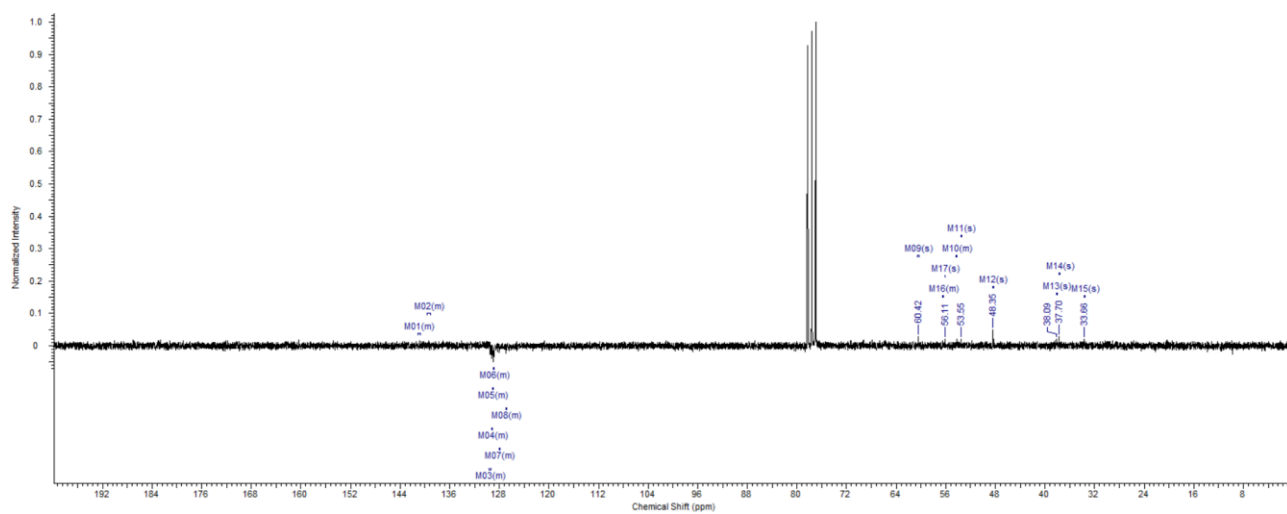

# Compound 14a (AD181)

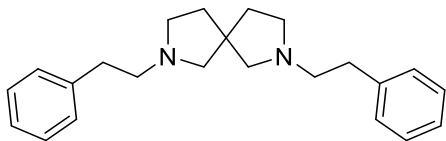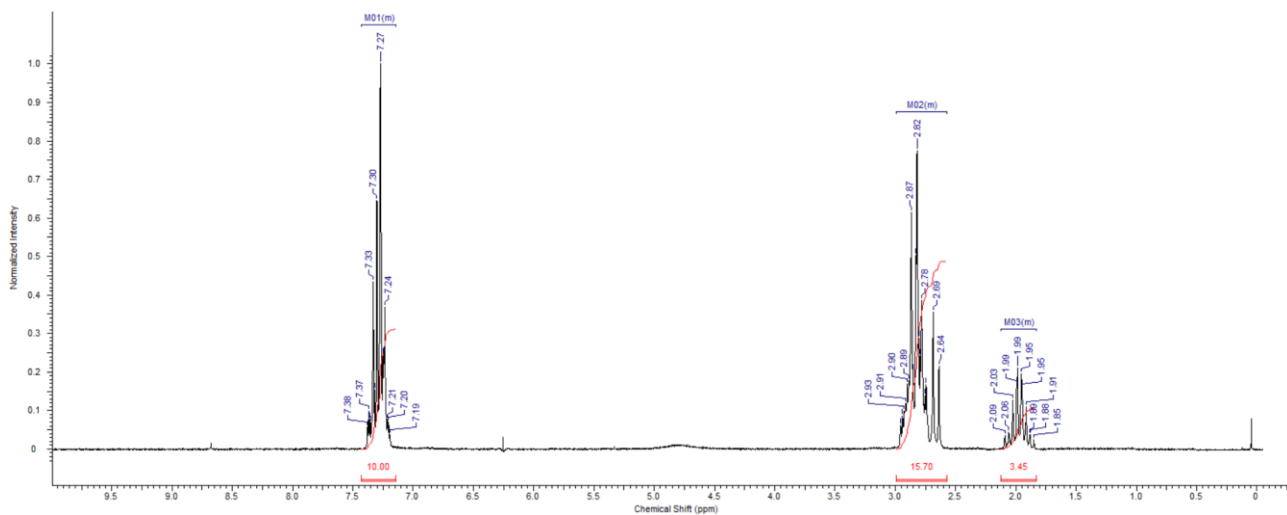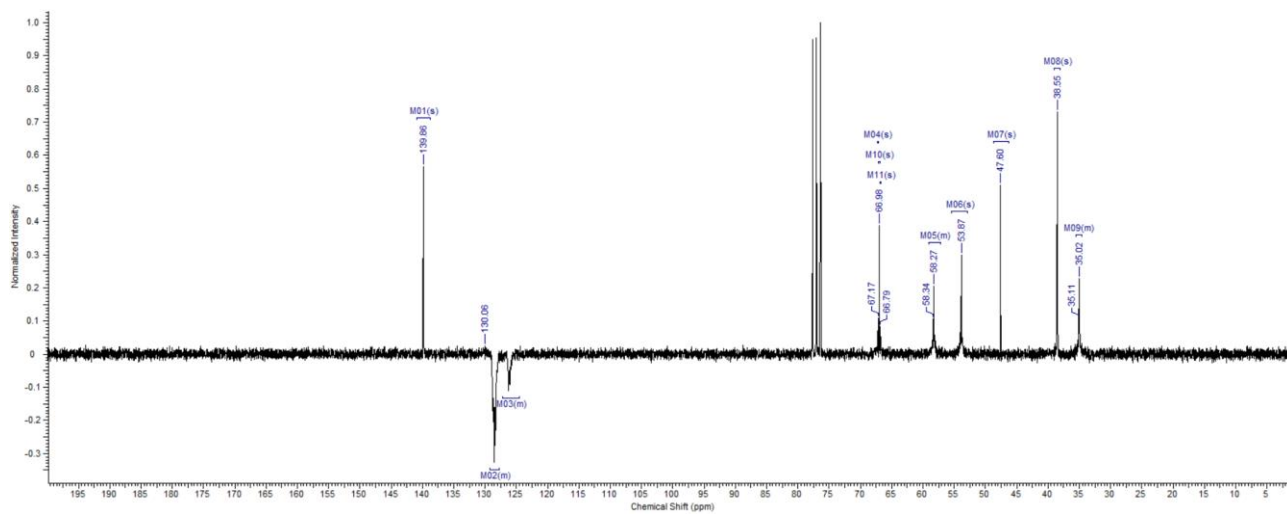

# Compound 14b (AD182)

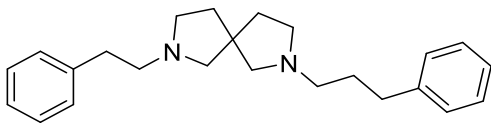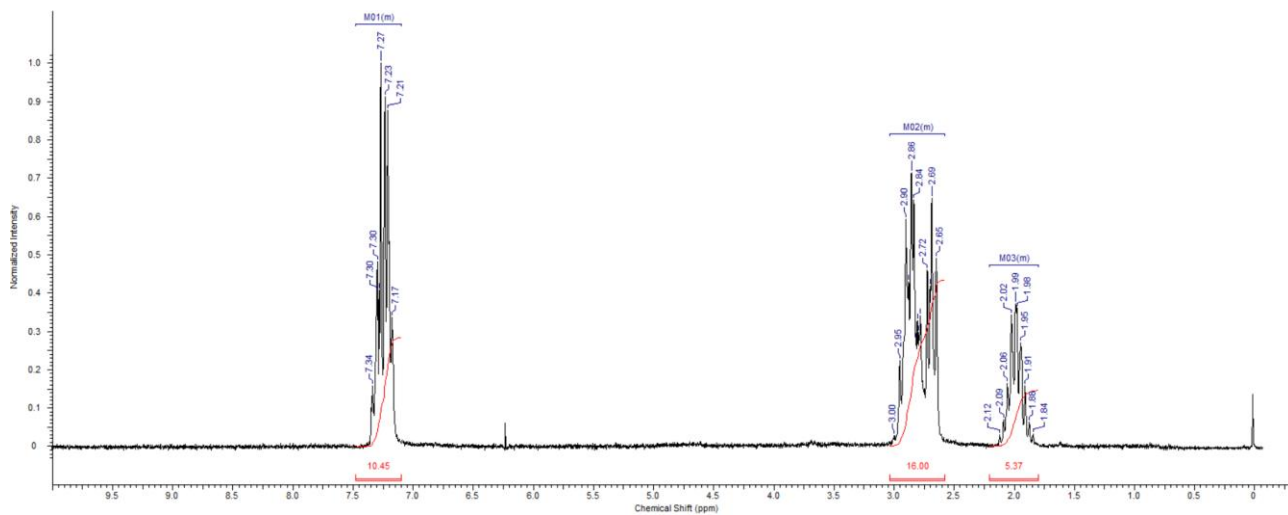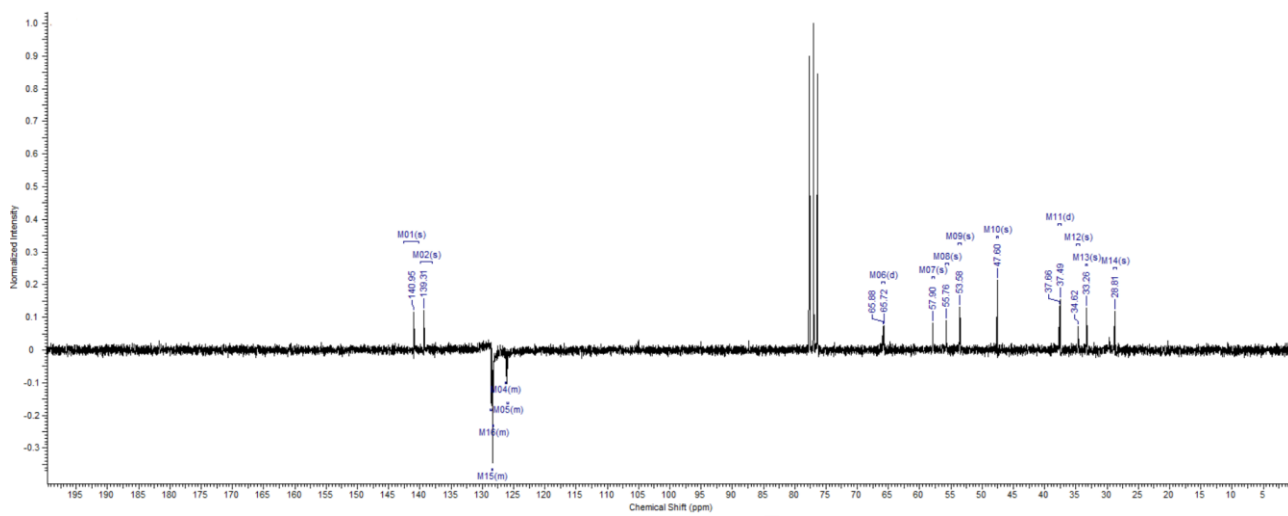

# Compound 15a (AD220)

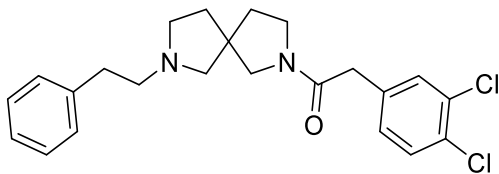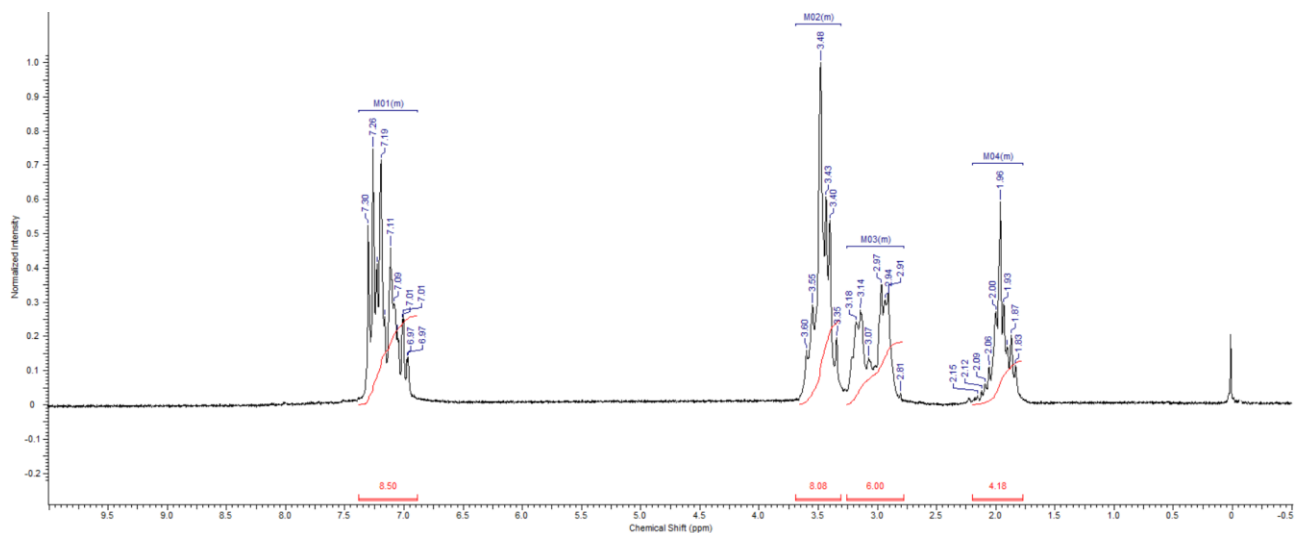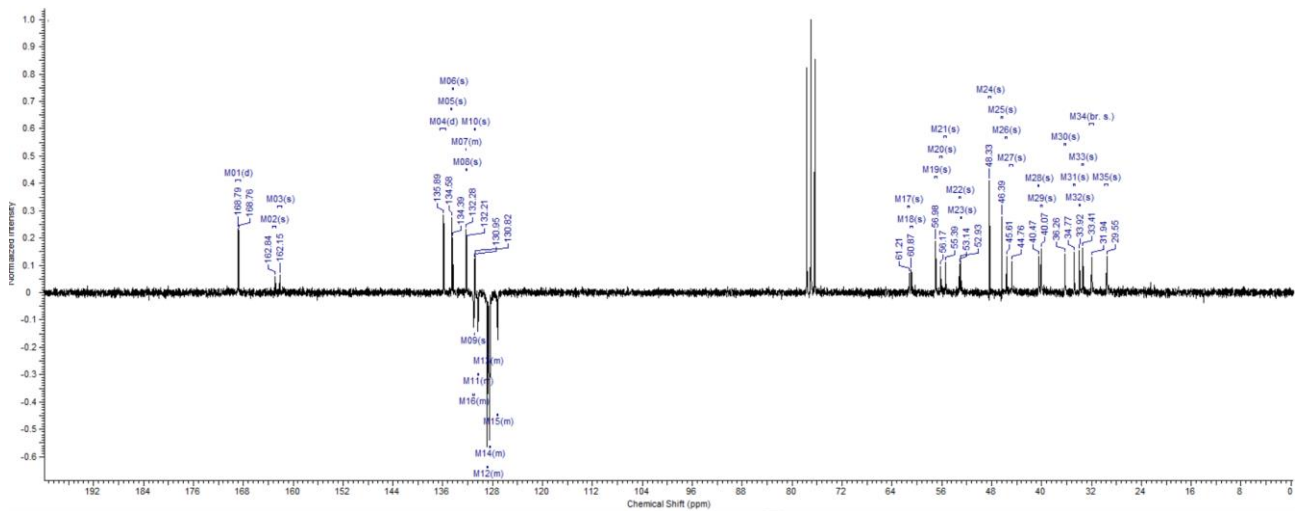

# Compound 15b (AD226)

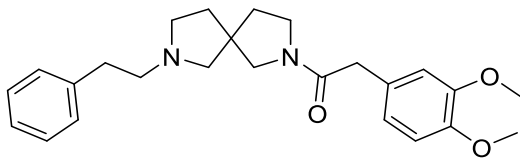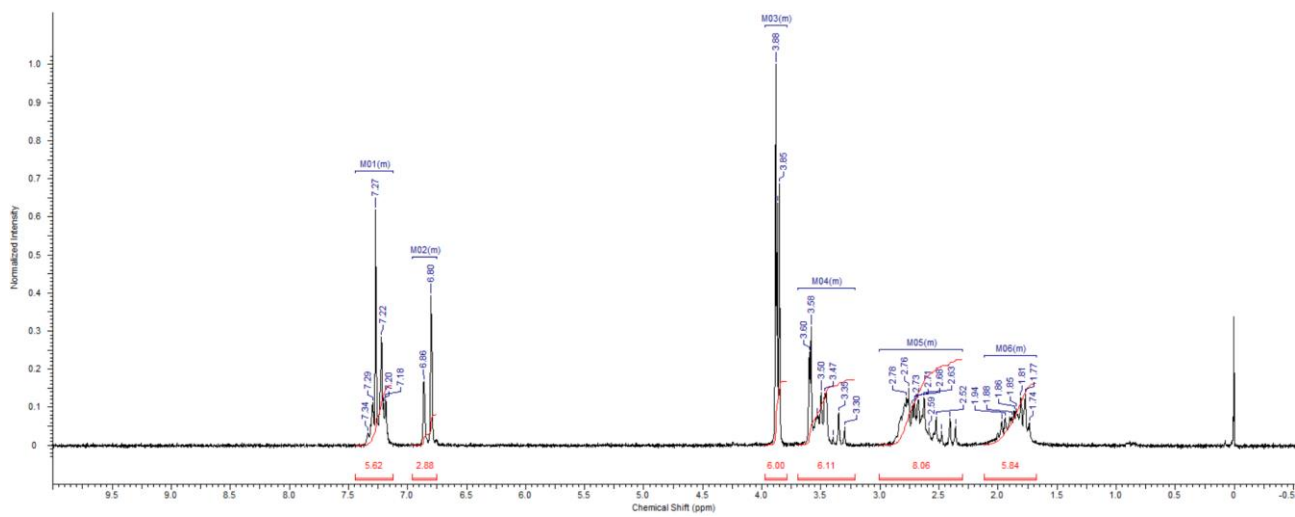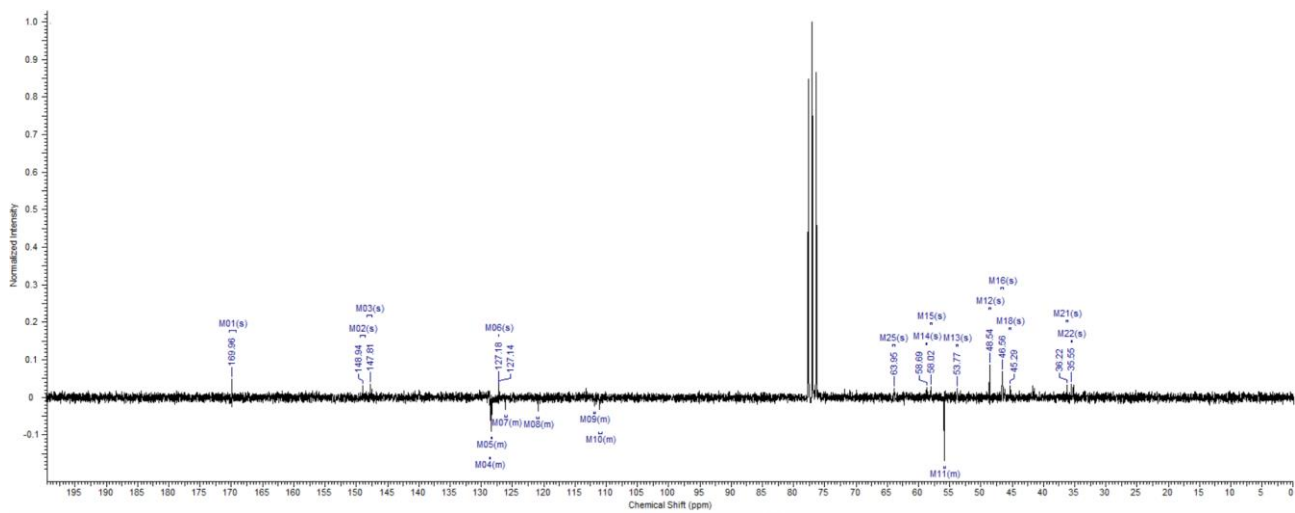

# Compound 15d (AD217)

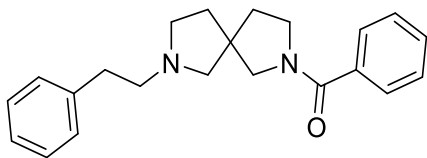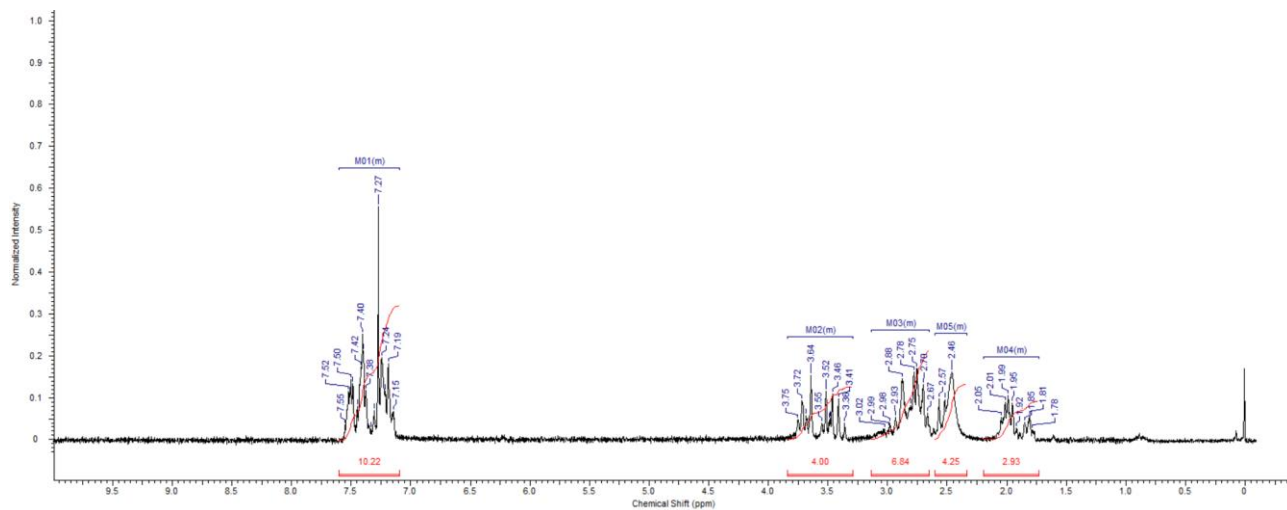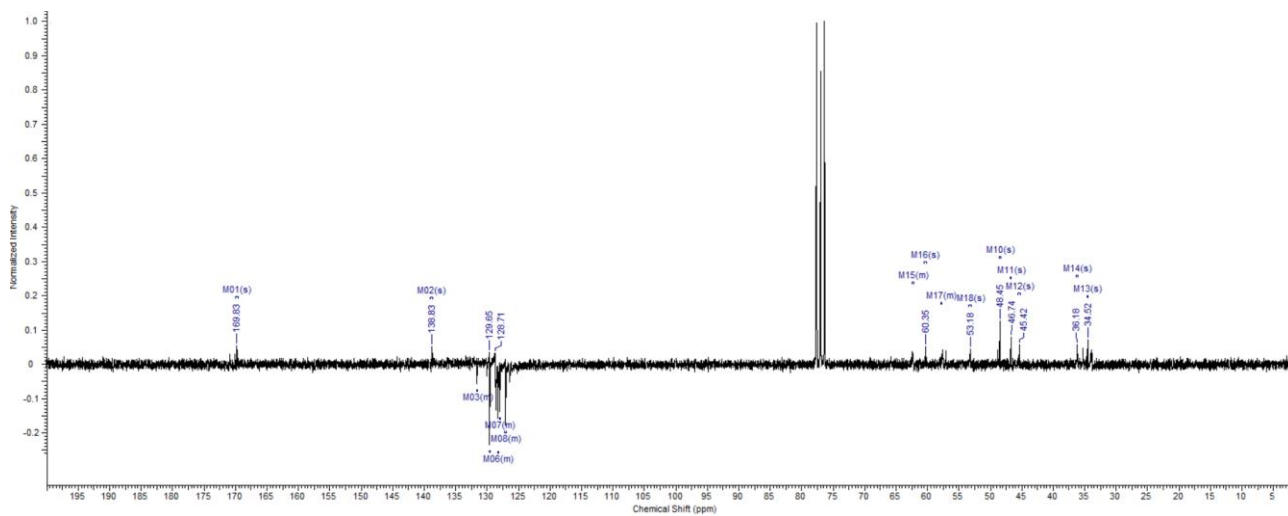



# Compound 15e (AD219)

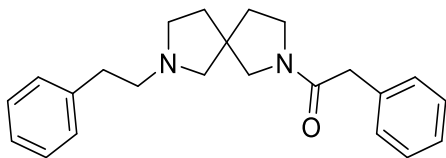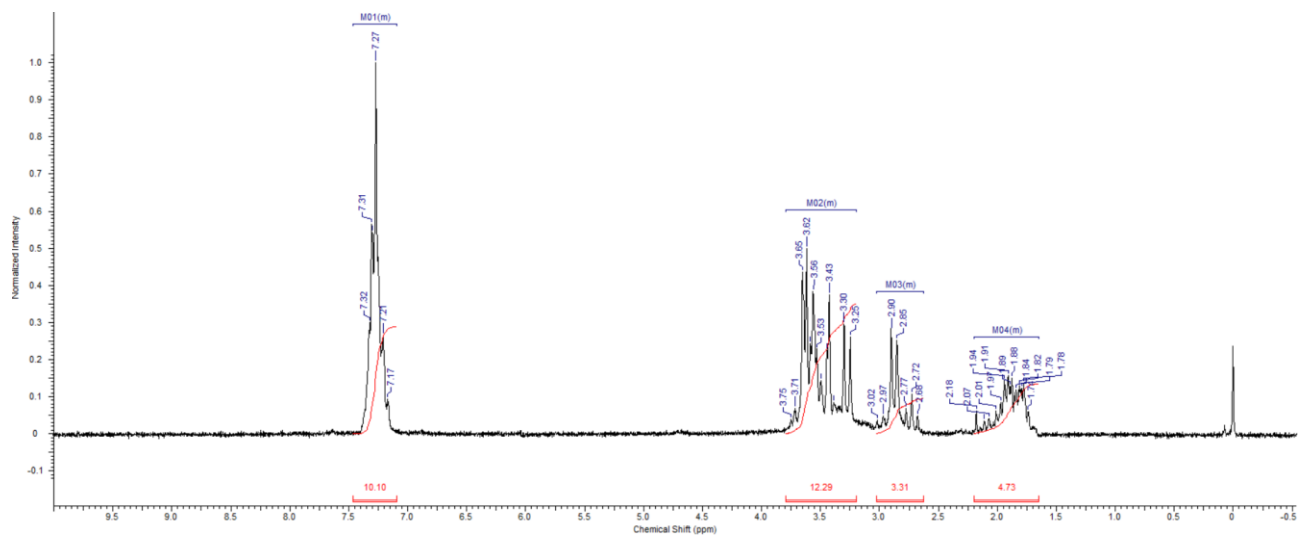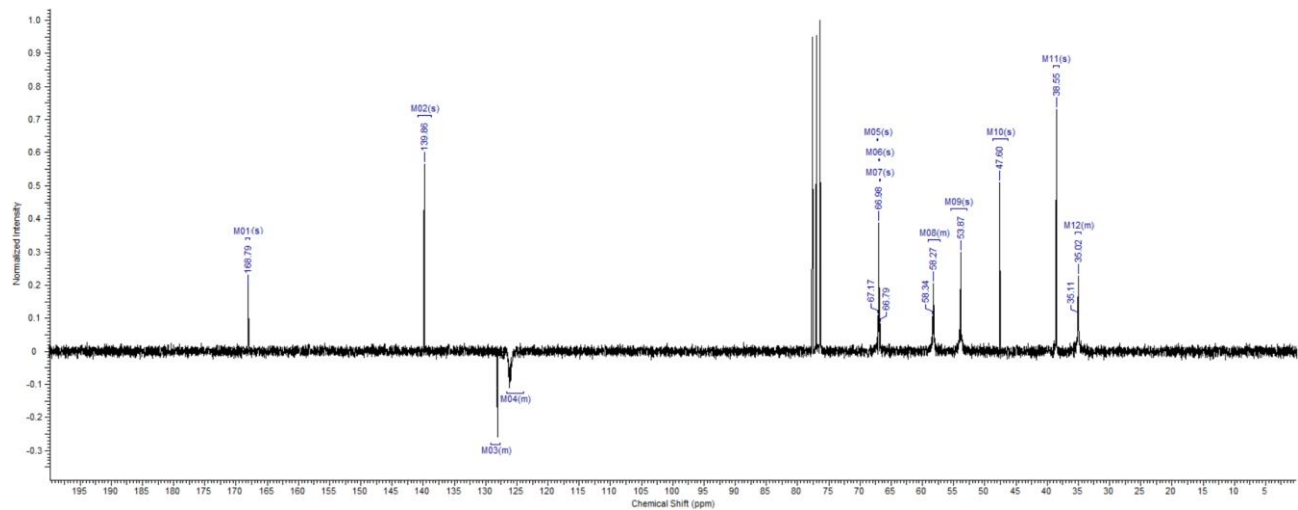

# Compound 16a (AD225)

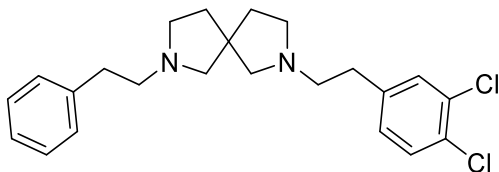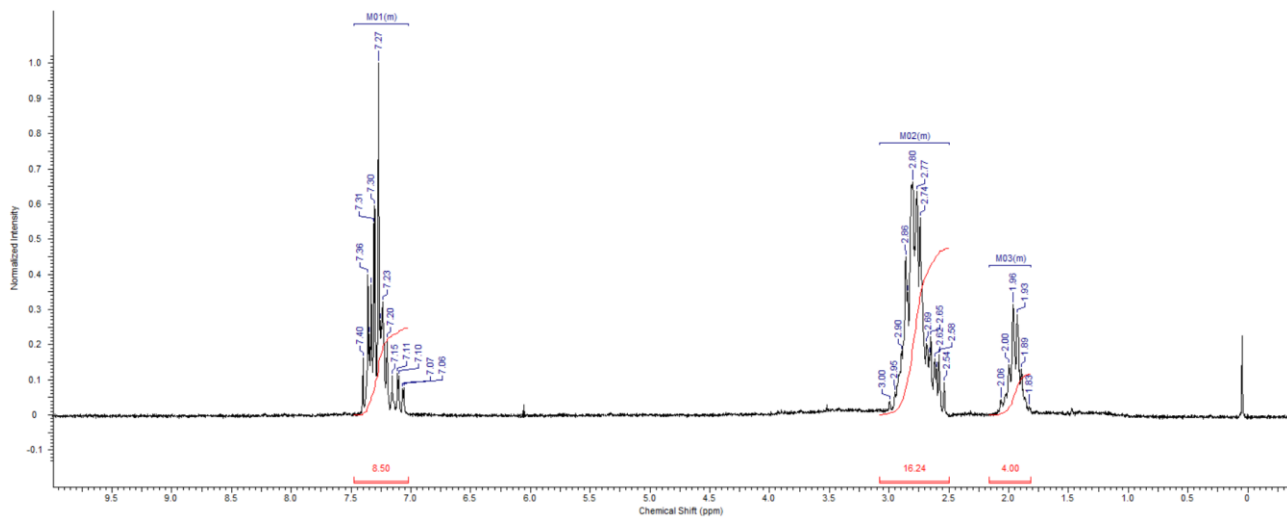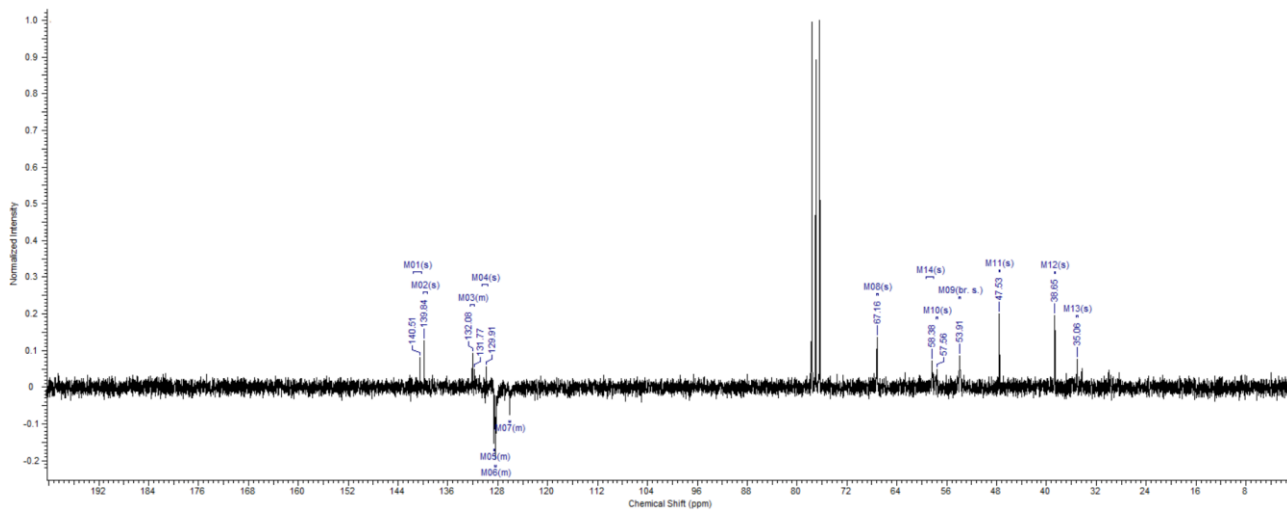

# Compound 16b (AD234)

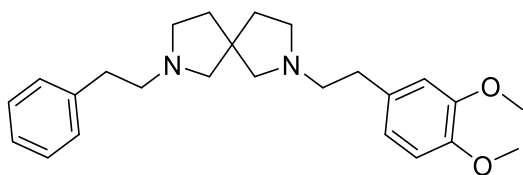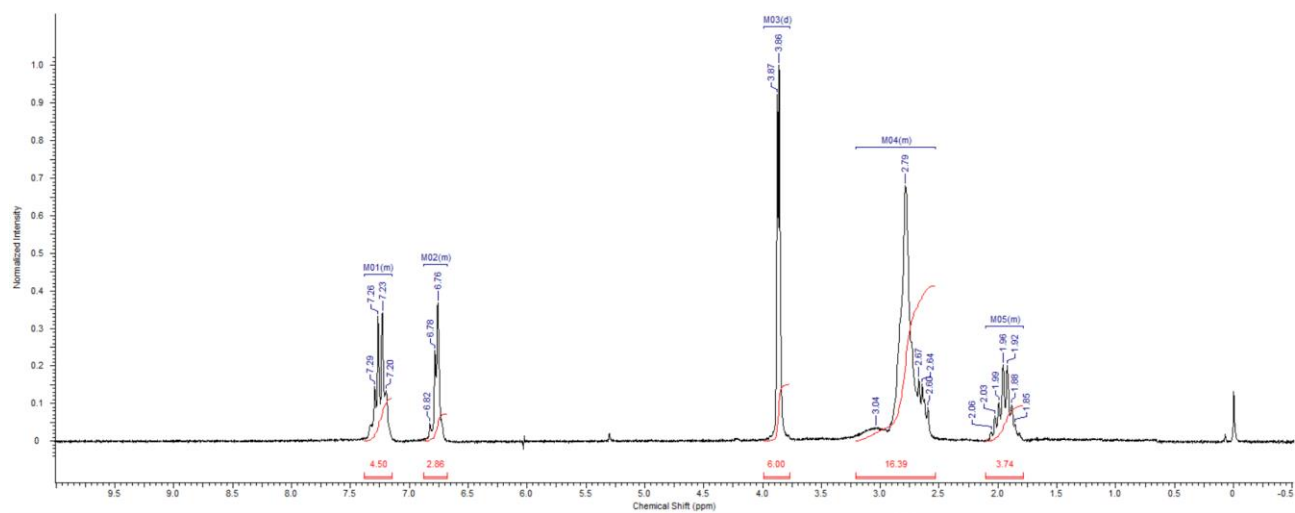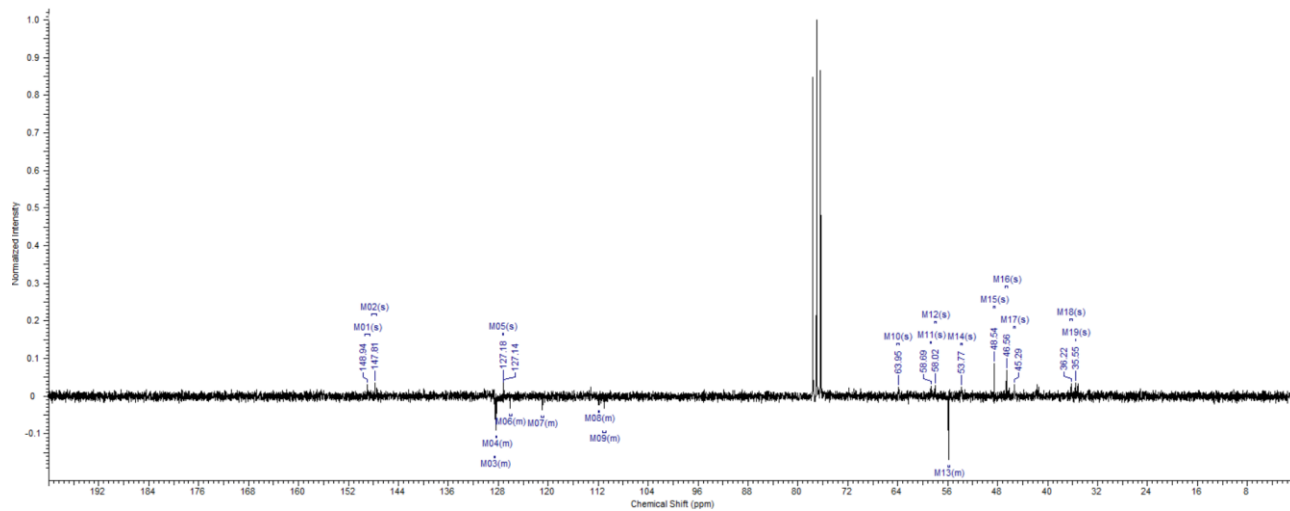

# Compound 16b (AD267)

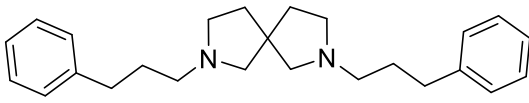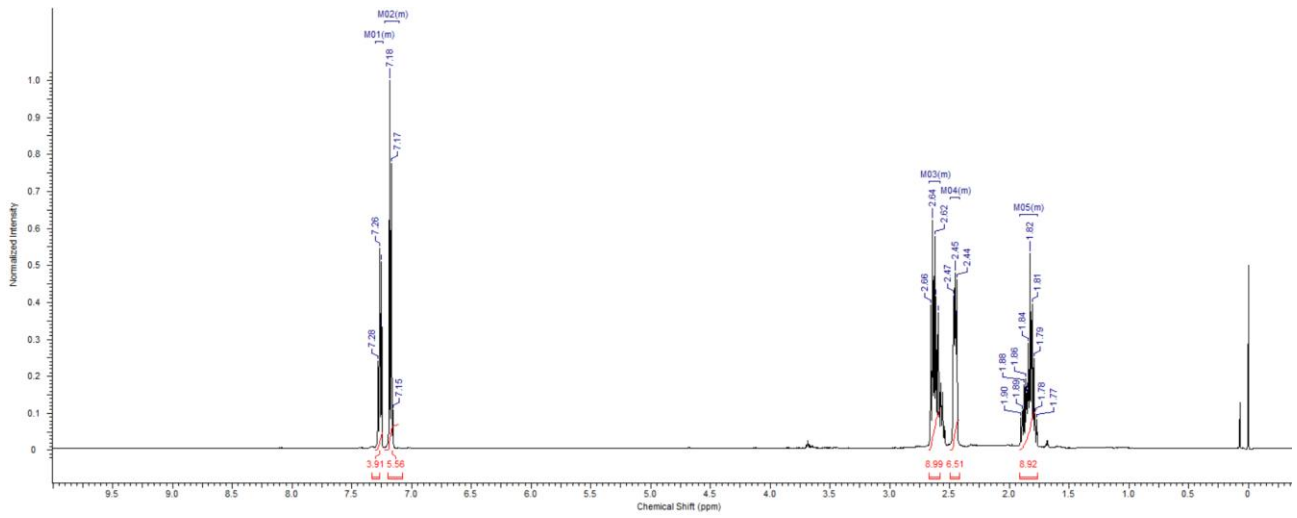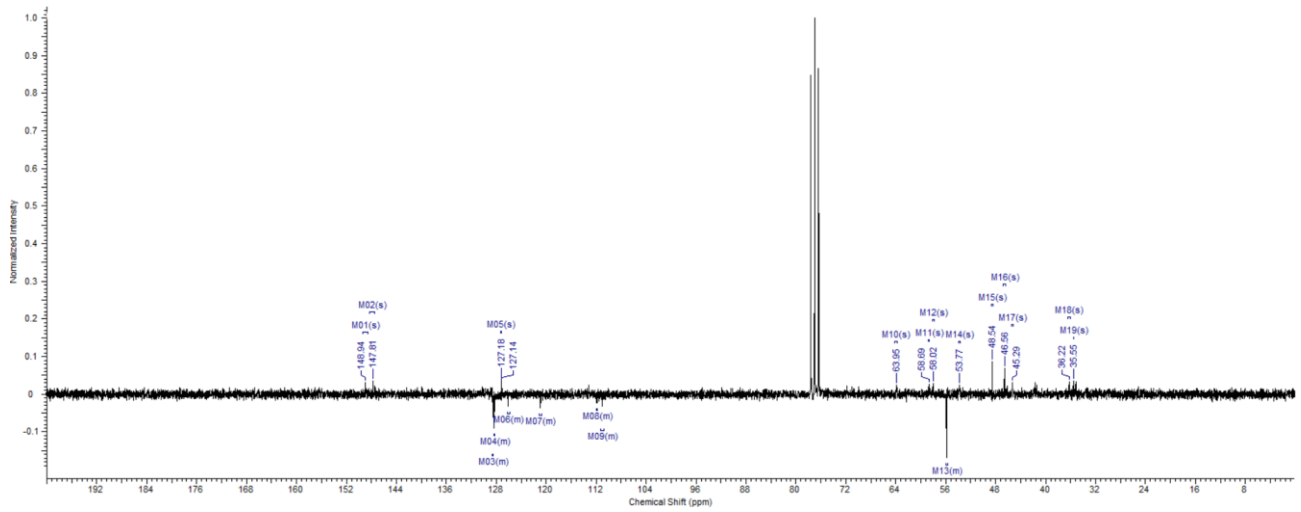

## Molecular modeling analysis

**Table S1.** Docking Score values of the 19 compounds in the presence of S1R and S2R. The Docking score values correspond to the average values of the compounds' stereoisomers.

| Compound   | D-Score* S1R | D-Score* S2R |
|------------|--------------|--------------|
| <b>7b</b>  | -8.78        | -8.10        |
| <b>8a</b>  | -8.53        | -8.02        |
| <b>8b</b>  | -9.41        | -8.24        |
| <b>9a</b>  | -9.47        | -7.50        |
| <b>9b</b>  | -9.29        | -8.05        |
| <b>9c</b>  | -10.07       | -8.35        |
| <b>9d</b>  | -9.63        | -8.05        |
| <b>11b</b> | -8.91        | -9.04        |
| <b>13a</b> | -9.13        | -8.44        |
| <b>13b</b> | -9.77        | -8.88        |
| <b>14a</b> | -9.75        | -8.76        |
| <b>14b</b> | -9.82        | -9.18        |
| <b>15a</b> | -11.16       | -7.74        |
| <b>15b</b> | -10.19       | -7.42        |
| <b>15d</b> | -10.10       | -8.36        |
| <b>15e</b> | -10.42       | -8.60        |
| <b>16a</b> | -9.81        | -8.93        |
| <b>16b</b> | -10.37       | -8.92        |
| <b>16c</b> | -10.25       | -8.39        |

*\*Docking Scores values are expressed in kcal/mol.*

|               |     |                                                     |     |
|---------------|-----|-----------------------------------------------------|-----|
| PDB 7M95      | 7   | MGTLGARRGLEWFLGFYFLSHIPITLLMDLQGVLPRLDLYPVELRNLQQWY | 56  |
| SIGMA 2 human | 1   | MGAPATRRRCVEWLLGLYFLSHIPITLFMDLQAVLPRELYPVEFRNLLKWY | 50  |
|               |     | ...  .:  .  .           .     .    :     .   .:     |     |
| PDB 7M95      | 57  | IEEFKDPLLQTPPAWFKSFLFCELVFQLPFFPIAAYAFFKGGCKWIRTPA  | 106 |
| SIGMA 2 human | 51  | AKEFKDPLLQEPPAWFKSFLFCELVFQLPFFPIATYAFLKGSCKWIRTPA  | 100 |
|               |     | .:       .                           .   .  .       |     |
| PDB 7M95      | 107 | IIYSVHTMTTLIPILSTLLDDFSKASHFRGQGPKTFQERLFLISVYIPY   | 156 |
| SIGMA 2 human | 101 | IIYSVHTMTTLIPILSTFLFEDFSKASGFKGQRPETLHERLTLVSVYAPY  | 150 |
|               |     | .  .:       .  : .  : .  .    .                     |     |
| PDB 7M95      | 157 | FLIPLILLLFMVRNPYYK                                  | 174 |
| SIGMA 2 human | 151 | LLIPFILLIFMLRSPYYK                                  | 168 |
|               |     | .   .   : : : : :                                   |     |

**Figure S1.** Sequence alignment between human and bovine S2R (PDB model 7M95). The single and the double dots indicate the different and similar residues between the human and bovine S2R sequences, respectively.

**Table S2.** Count and percentage of actives in top N% of results for S1R.

| % Results | 1   | 2   | 5    | 10   | 20   |
|-----------|-----|-----|------|------|------|
| # Actives | 1   | 1   | 3    | 3    | 7    |
| % Actives | 6.7 | 6.7 | 20.0 | 20.0 | 46.7 |

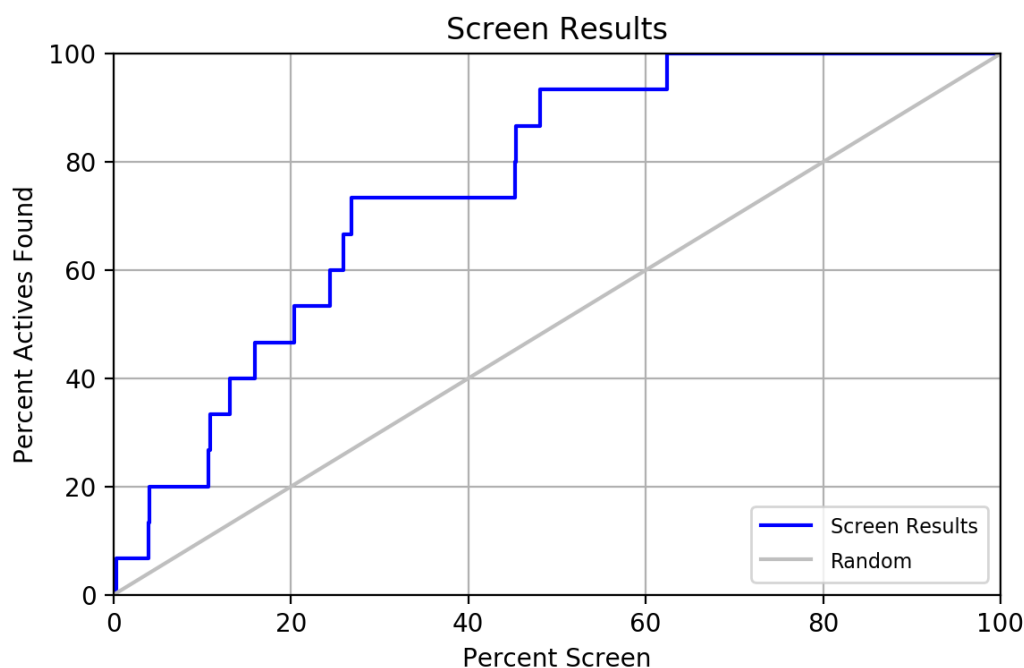

**Figure S2.** Percent screen plot for S1R. The percentage of the processed compounds and the percentage of the identified active compounds are reported on the abscissa and on the ordinate axes, respectively.

**Table S3.** Count and percentage of actives in top N% of results for S2R.

| % Results | 1    | 2    | 5    | 10   | 20    |
|-----------|------|------|------|------|-------|
| # Actives | 5    | 7    | 11   | 13   | 15    |
| % Actives | 33.3 | 46.7 | 73.3 | 86.7 | 100.0 |

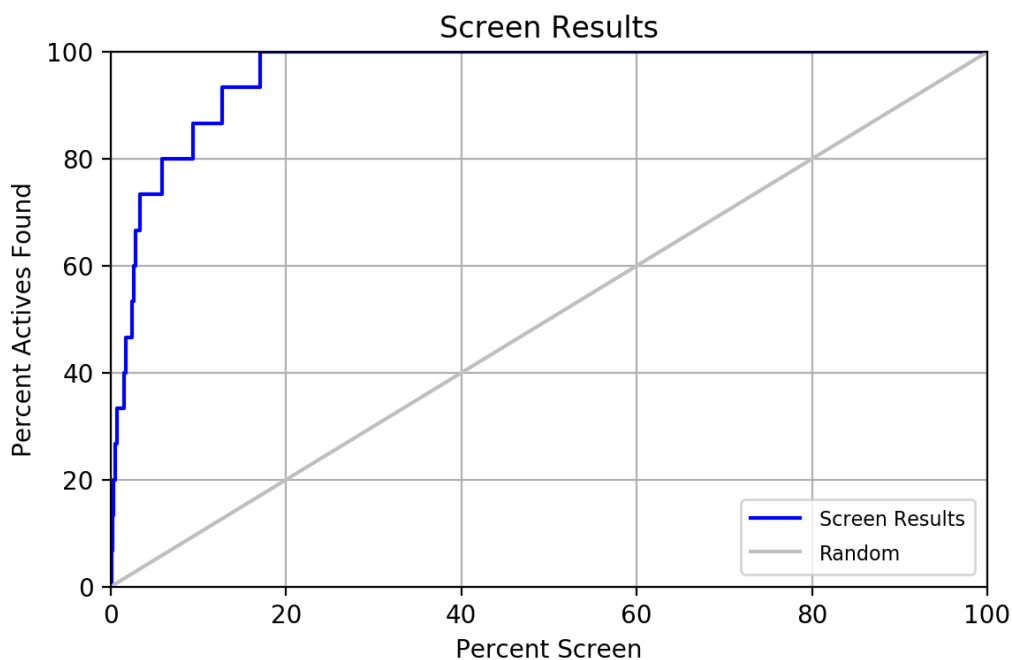

**Figure S3.** Percent screen plot for S2R. The percentage of the processed compounds and the percentage of the identified active compounds are reported on the abscissa and on the ordinate axes, respectively.
